# Supplementary material
Source: PubMed Central journal article supplement (PMC6921662)
Supplement: IAI.00776-19-s0001.pdf [file IAI.00776-19-s0001.pdf]

Table S1

Table S1. Growth of lipid metabolism mutants on plates with the indicated carbon sources.

| Genotype <sup>1</sup>                                                              | Aerobic <sup>2</sup> |                  |                |    | Anaerobic + 25 mM nitrate <sup>3</sup> |       |     |    |
|------------------------------------------------------------------------------------|----------------------|------------------|----------------|----|----------------------------------------|-------|-----|----|
|                                                                                    | Glu                  | C18:1            | C10            | C8 | Glu                                    | C18:1 | C10 | C8 |
| Wild Type                                                                          |                      |                  |                |    |                                        |       |     |    |
| Wild Type (pRB-273c)                                                               | 1 <sup>4</sup>       | 2                | - <sup>5</sup> | -  | 3                                      | 6     | 8   | 10 |
| $\Delta$ <i>fadR</i> <sup>6</sup>                                                  | 1                    | 2                | 4              | 6  | 3                                      | 6     | 8   | 10 |
| $\Delta$ <i>fadL</i><br><i>fadL::kan</i>                                           | 1                    | -                | -              | -  | 3                                      | -     | -   | -  |
| $\Delta$ <i>fadL</i> (pRB3- <i>fadL</i> )<br><i>fadL::kan</i> (pRB3- <i>fadL</i> ) | 1                    | 1-2              | -              | -  | 3                                      | 6     | 8   | 10 |
| $\Delta$ <i>fadD</i><br><i>fadD::kan</i>                                           | 1                    | -                | -              | -  | 3                                      | -     | -   | -  |
| $\Delta$ <i>fadD</i> (pRB3- <i>fadD</i> )<br><i>fadD::kan</i> (pRB3- <i>fadD</i> ) | 1                    | 2                | -              | -  | 3                                      | 6     | 8   | 10 |
| <i>ydiD::kan</i>                                                                   | 1                    | 2                | -              | -  | 3                                      | 6     | 8   | 10 |
| $\Delta$ <i>fadD</i> ; <i>ydiD::kan</i>                                            | 1                    | -                | -              | -  | 3                                      | -     | -   | -  |
| $\Delta$ <i>yafH</i><br><i>yafH::kan</i>                                           | 1                    | -                | -              | -  | 3                                      | 6     | 8   | 10 |
| <i>ydiO::cm</i>                                                                    | 1                    | 2                | -              | -  | 3                                      | -     | -   | -  |
| $\Delta$ <i>yafH</i> ; <i>ydiO::cm</i>                                             | 1                    | -                | -              | -  | 3                                      | -     | -   | -  |
| $\Delta$ <i>fadBA</i><br><i>fadBA::kan</i>                                         | 1                    | 3-4 <sup>7</sup> | -              | -  | 3                                      | 6     | 8   | 10 |
| <i>yfcYX::kan</i>                                                                  | 1                    | 2                | -              | -  | 3                                      | 14    | -   | -  |
| $\Delta$ <i>fadBA</i> ; <i>yfcYX::kan</i>                                          | 1                    | -                | -              | -  | 3                                      | -     | -   | -  |
| $\Delta$ <i>aceA</i><br><i>aceA::kan</i>                                           | 1                    | -                | -              | -  | 3                                      | -     | -   | -  |
| $\Delta$ <i>aceA</i> (pRB3- <i>aceA</i> )<br><i>aceA::kan</i> (pRB3- <i>aceA</i> ) | 1                    | 2                | -              | -  | 3                                      | 6     | 8   | 10 |
| $\Delta$ <i>aceB</i><br><i>aceB::cm</i>                                            | 1                    | -                | -              | -  | 3                                      | -     | -   | -  |
| $\Delta$ <i>aceB</i> (pRB3- <i>aceB</i> )<br><i>aceB::cm</i> (pRB3- <i>aceB</i> )  | 1                    | 2                | -              | -  | 3                                      | 6     | 8   | 10 |

<sup>1</sup> Strains with lesions in the same gene had identical phenotypes and are therefore recorded in the same row.

<sup>2</sup> Bacteria were grown on M9 minimal plates containing the indicated carbon sources solubilized using 1% igepal CA-630; other supplements are listed in the methods. No growth was observed on plates lacking a carbon source. Import mutant strains are black (canonical) or orange (secondary);  $\beta$ -oxidation mutants are blue (canonical) or red (secondary); glyoxylate shunt mutants are green.

<sup>3</sup> Nitrate was added as an alternative electron acceptor; no anaerobic growth was observed on plates lacking nitrate.

<sup>4</sup> Growth is recorded as the day on which colonies were discernible by eye; data are from two independent biological replicates.

<sup>5</sup> No colonies were discernible for up to two weeks.

<sup>6</sup> *fadR* encodes a transcriptional repressor of canonical lipid metabolism genes that prevents aerobic growth on medium-chain fatty acids in the absence of long-chain acyl-CoA molecules.

<sup>7</sup> Strains lacking *fadBA* grow on oleate due to compensation by *yfcYX*.
