# Supplementary material
Source: PubMed Central journal article supplement (PMC6921662)
Supplement: IAI.00776-19-s0002.pdf [file IAI.00776-19-s0002.pdf]

Figure S1

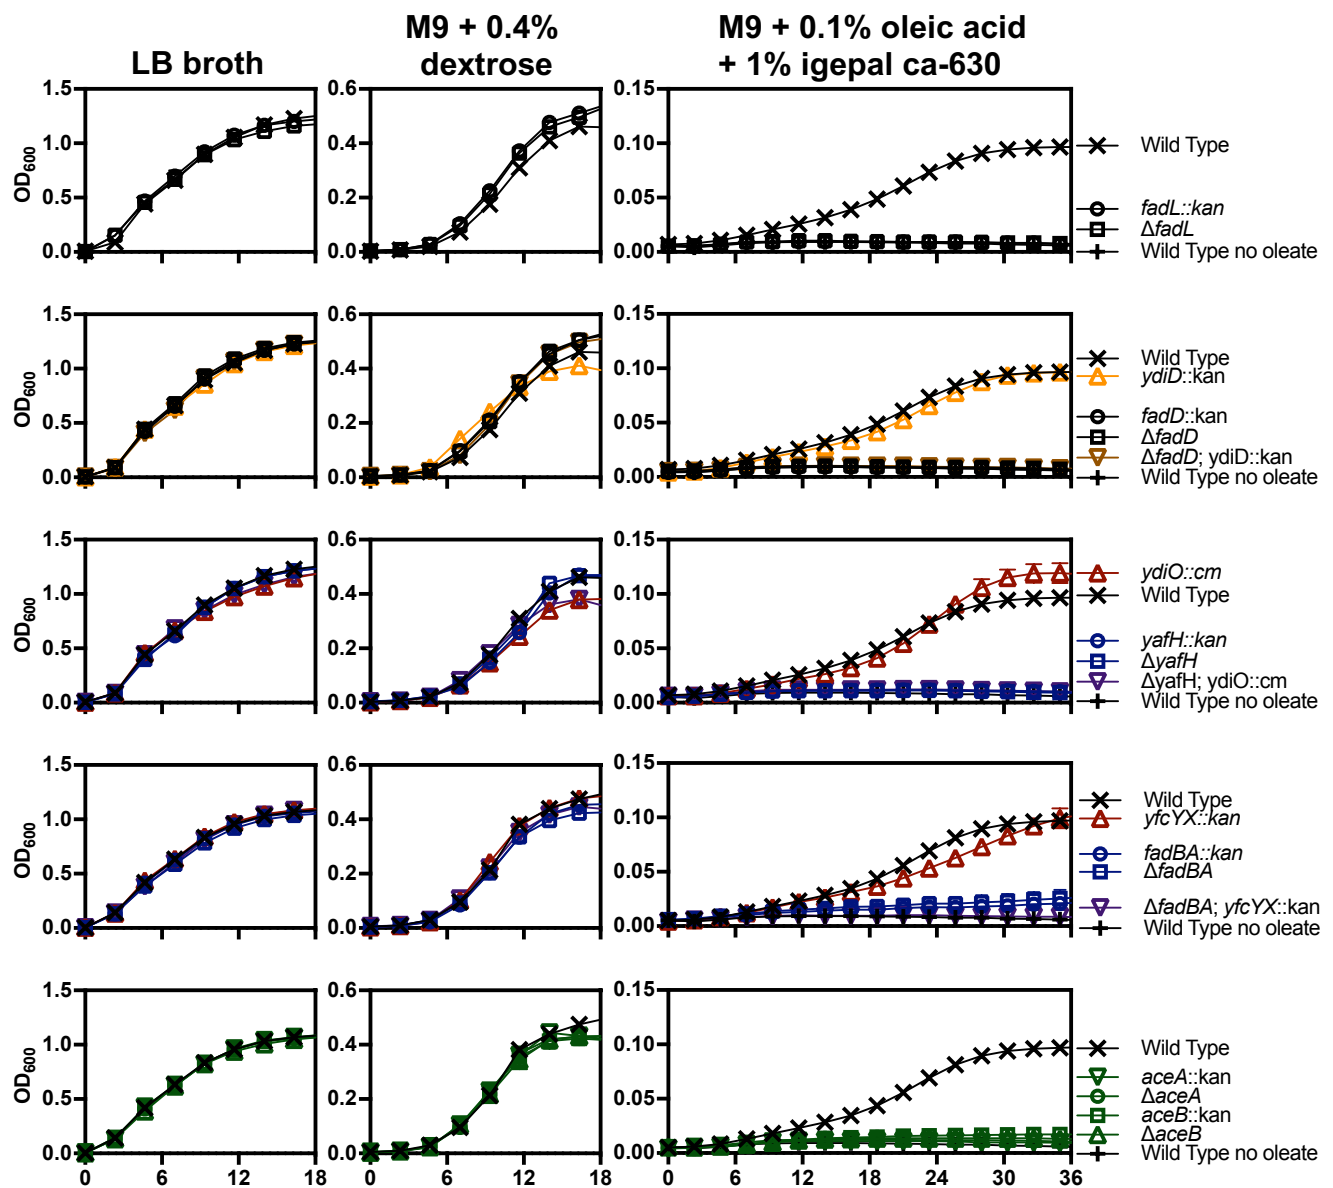

**Figure S1. *Salmonella* lipid metabolism mutant strains do not grow on oleate.** Bacteria were grown in the indicated media and optical density was measured over 18-36 hours. Mean and standard deviation of triplicate samples from a representative of three independent experiments are shown. Oleate was solubilized with igepal; no growth was observed in the igepal, no oleate condition (+). Import mutant strains are black (canonical), orange (secondary), or brown (canonical / secondary double mutants);  $\beta$ -oxidation mutants are blue (canonical), red (secondary), or purple (canonical / secondary double mutants); glyoxylate shunt mutants are green.
