# Supplementary material
Source: PubMed Central journal article supplement (PMC6921662)
Supplement: IAI.00776-19-s0003.pdf [file IAI.00776-19-s0003.pdf]

Figure S2

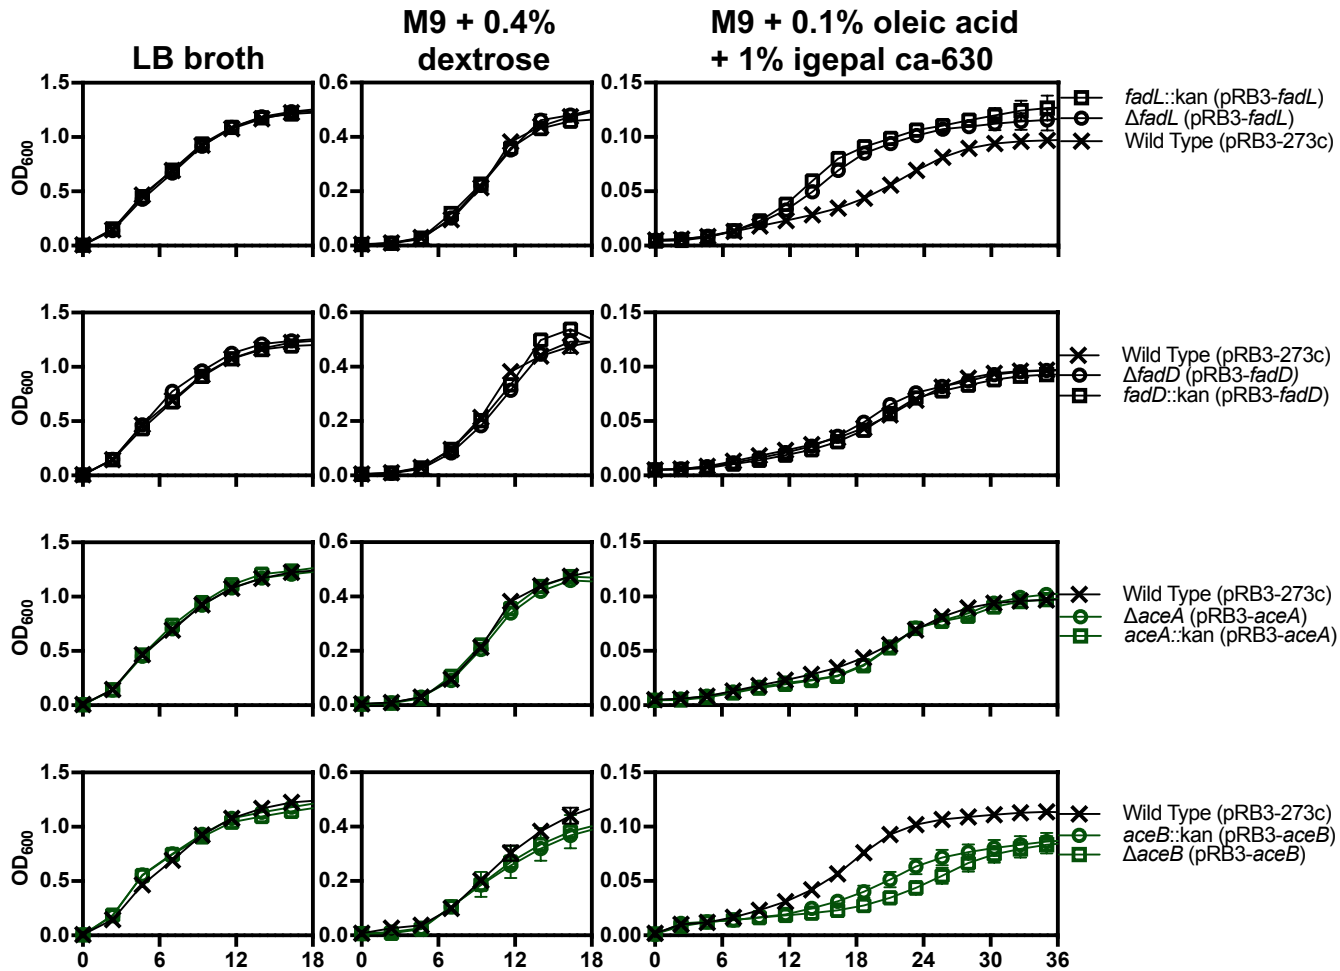

**Figure S2. Complementation of oleate growth phenotypes.** Bacteria were grown in the indicated media and optical density was measured over 18-36 hours. Mean and standard deviation of triplicate samples from a representative of three independent experiments are shown.
