# Supplementary material
Source: PubMed Central journal article supplement (PMC6921662)
Supplement: IAI.00776-19-s0004.pdf [file IAI.00776-19-s0004.pdf]

**Figure S3**

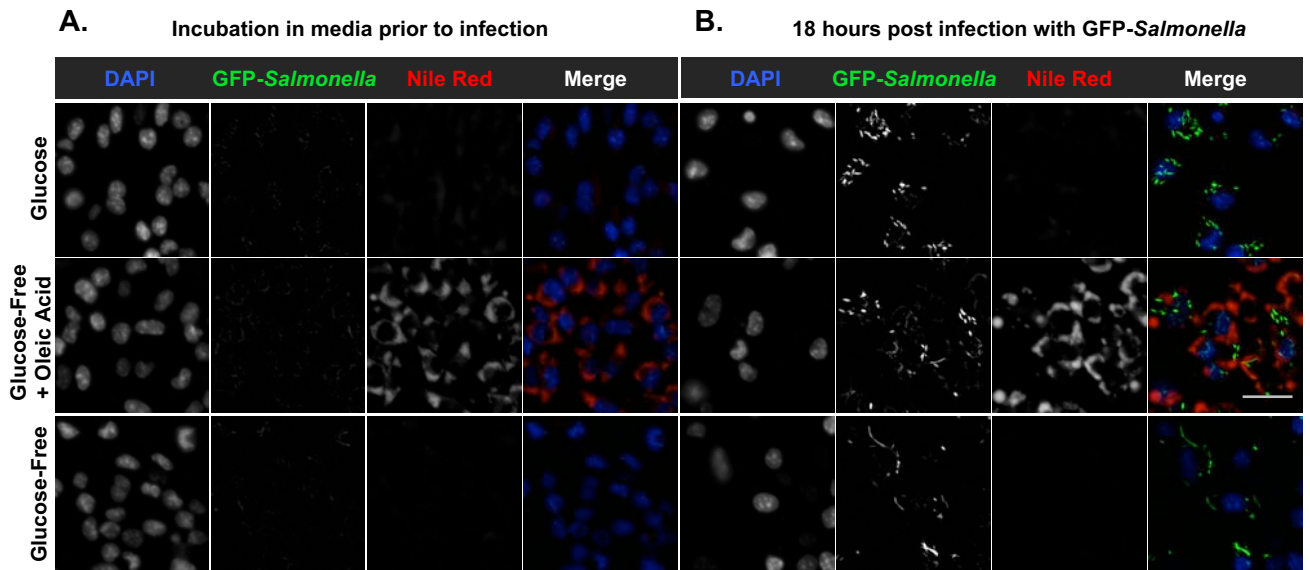

**Figure S3. Lipid droplet accumulation in macrophages cultured in glucose-free medium with oleic acid.** Cells were seeded onto glass coverslips, and transferred into defined medium containing NEAA with the indicated carbon source and activated with IFN- $\gamma$  for 18-24 hours and fixed (A). Parallel samples were infected with GFP-expressing wild-type bacteria and fixed after 18 hours (B). Coverslips were stained with 1  $\mu$ M DAPI and 1  $\mu$ g/ml Nile Red, and imaged on a widefield fluorescence microscope using a 40X objective. Similar results were observed for resting macrophages, RAW 264.7 macrophages, or for macrophages cultured in the absence of NEAA. Scale bar is 20  $\mu$ m.
