# Supplementary material
Source: PubMed Central journal article supplement (PMC6921662)
Supplement: IAI.00776-19-s0005.pdf [file IAI.00776-19-s0005.pdf]

**Figure S4**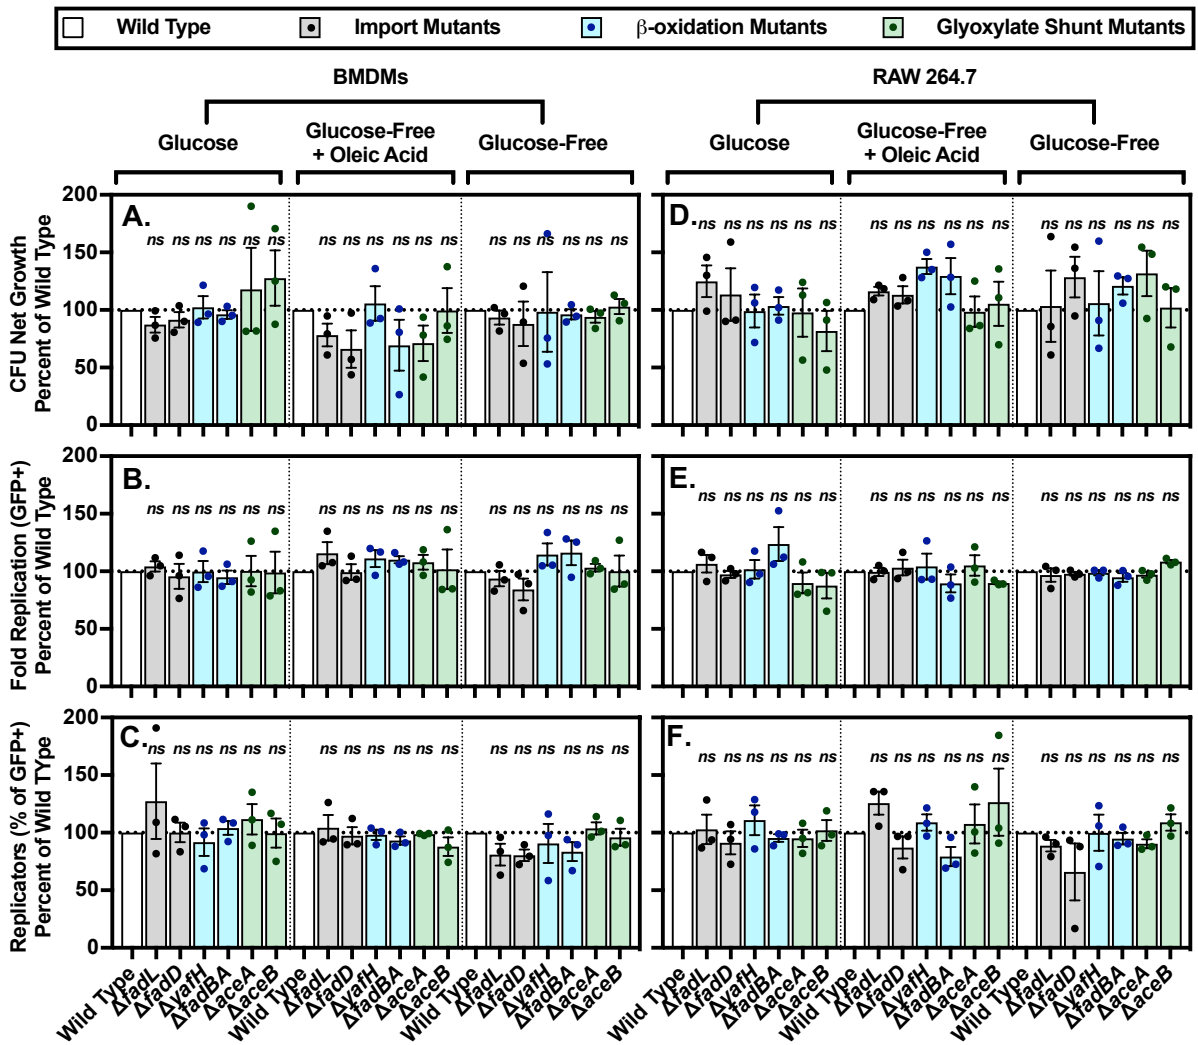

**Figure S4. Lipid metabolism genes are dispensable for growth and replication in resting macrophages that were not supplemented with non-essential amino acids (NEAA).** BMDMs (left) or RAW 264.7 (right) cells were transferred into defined medium with the indicated carbon source without added NEAA 18-24 hours prior to infection with the indicated strains. (A) Net growth was calculated as CFU at 18 hours divided by CFU at 2 hours post infection. (B) Overall fold replication for the GFP+ population and (C) the percentage of replicating bacteria were measured using fluorescence dilution. Data were normalized to wild type (100%). Average of triplicate samples from each of three independent biological replicates (circles) is superimposed on mean and SEM. There were no significant differences by one-way ANOVA.
