# Supplementary material
Source: PubMed Central journal article supplement (PMC6921662)
Supplement: IAI.00776-19-s0007.pdf [file IAI.00776-19-s0007.pdf]

Figure S6

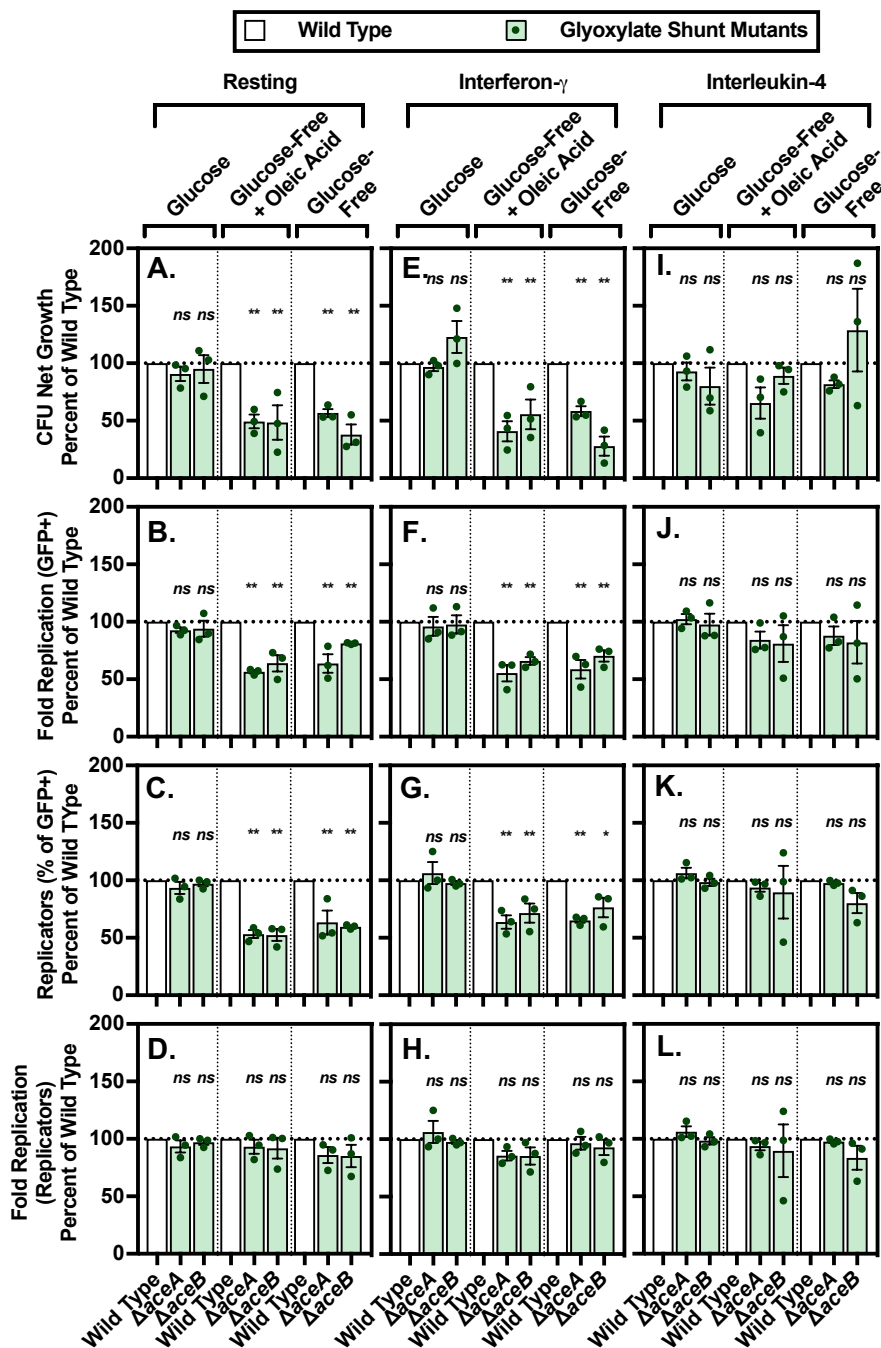

**Figure S6. A lack of glucose in the macrophage culture media uncovers a *Salmonella* requirement for the glyoxylate shunt genes in resting and interferon- $\gamma$ -pretreated RAW 264.7 cells supplemented with NEAA.** RAW 264.7 cells were transferred into defined medium with the indicated carbon source for 18-24 hours prior to infection with the indicated strains. Net growth was calculated as CFU at 18 hours post infection divided by CFU at 2 hours post infection (A, E, I). Fluorescence dilution was used to calculate fold replication for all GFP+ bacteria (B, F, J), percentage of GFP-low replicating bacteria (C, G, K), and fold replication of the GFP-low population of replication bacteria (D, H, L). GFP-low replicating bacteria were gated based on the fluorescence of the inoculum. Data were normalized to wild type (100%). Average of triplicate samples from each of three independent biological replicates (circles) is superimposed on mean and SEM. \*  $p < 0.05$ ; \*\*  $p < 0.01$ ; \*\*\*  $p < 0.001$ ; \*\*\*\*  $p < 0.0001$  by one-way ANOVA.
